# Supplementary material for: A structural study on a specific Li-ion ordered complex in dimethyl carbonate-based dual-cation electrolytes
Source: Royal Society of Chemistry journal article supplement (doi:10.1039/d3cp05526d), 2024-01-01
Supplement: d3cp05526d1.pdf [file d3cp05526d1.pdf]

## Electronic Supplementary Information

# Structural study on a specific Li-ion ordered complex in dimethyl carbonate-based dual-cation electrolytes

*Yu Chikaoka,<sup>a,b\*</sup> Tomoya Tashiro,<sup>c</sup> Saki Sawayama,<sup>c</sup> Ayana Kobayashi,<sup>a</sup> Ayuna Matsumoto,<sup>a</sup> Etsuro Iwama,<sup>a,b</sup> Katsuhiko Naoi,<sup>a,b\*</sup> and Kenta Fujii<sup>c\*</sup>*

<sup>a</sup> Department of Applied Chemistry, Tokyo University of Agriculture & Technology, 2-24-16 Naka-cho, Koganei, Tokyo 184-8558, Japan

<sup>b</sup> Global Innovation Research Organization, Tokyo University of Agriculture & Technology, 2-24-16 Naka-cho, Koganei, Tokyo, 184-8588 Japan

<sup>c</sup> Graduate School of Sciences and Technology for Innovation, Yamaguchi University, 2-16-1 Tokiwadai, Ube, Yamaguchi 755-8611, Japan

\*E-mail: [chika@go.tuat.ac.jp](mailto:chika@go.tuat.ac.jp) / [k-naoi@cc.tuat.ac.jp](mailto:k-naoi@cc.tuat.ac.jp) / [k-fujii@yamaguchi-u.ac.jp](mailto:k-fujii@yamaguchi-u.ac.jp)

## Details in MD simulations.

Data curation of the MD simulation was done at intervals of 0.1 ps during the last 500 ps, after which the X-ray weighted structure factors  $S^{\text{MD}}(q)$  and the radial distribution functions  $G^{\text{MD}}(q)$  were estimated. Based on previous studies, the OPLS-AA-based force fields that incorporate intermolecular Lennard–Jones (LJ) and coulombic interactions as well as intramolecular interactions of bond stretching, angle bending, and torsion of dihedral angles, were employed for DMC,<sup>1,2</sup> SBP<sup>+</sup>,<sup>2-4</sup> EMI<sup>+</sup>,<sup>5</sup> and BF<sub>4</sub><sup>-</sup>.<sup>6</sup> The partial charges for the DMC, SBP<sup>+</sup>, EMI<sup>+</sup>, and BF<sub>4</sub><sup>-</sup> were obtained from DFT calculations (ChelpG method, Fig. S1). The  $S^{\text{MD}}(q)$  values were determined from the MD simulations trajectories using Eq. S-1.

$$S^{\text{MD}}(q) = \begin{cases} \frac{\sum_i \sum_j \left\{ \frac{n_i(n_j-1)f_i(q)f_j(q)}{N(N-1)} \right\}}{\left\{ \sum_k \left( \frac{n_k f_k(q)}{N} \right) \right\}^2} \int_0^{r_{\text{max}}} 4\pi r^2 \rho_0 (g_{ij}^{\text{MD}}(r) - 1) \frac{\sin qr}{qr} dr + 1 (i = j) \\ \frac{\sum_i \sum_j \left\{ \frac{2n_i n_j f_i(q)f_j(q)}{N^2} \right\}}{\left\{ \sum_k \left( \frac{n_k f_k(q)}{N} \right) \right\}^2} \int_0^{r_{\text{max}}} 4\pi r^2 \rho_0 (g_{ij}^{\text{MD}}(r) - 1) \frac{\sin qr}{qr} dr + 1 (i \neq j) \end{cases} \quad (\text{S-1})$$

where  $r_{\text{max}}$  is the upper integration limit (25 Å),  $N$  is the total number of atoms within the cubic simulation box as defined by  $N = \sum_k nk$ , and  $g_{ij}^{\text{MD}}(r)$  is the atom–atom pair correlation function for atoms  $i$  and  $j$ .  $G^{\text{MD}}(q)$  was obtained from the calculated  $S^{\text{MD}}(q)$  using an inverse Fourier transform.

**Table S1.** Compositions (number of salts and solvent), box lengths of the system, and densities ( $d$ ) for MD simulations.

| Sample                                                       | Li-BF <sub>4</sub> | SBP-BF <sub>4</sub><br>(or EMIBF <sub>4</sub> ) | DMC  | Box length / Å | $d / \text{g cm}^{-3}$ |       | $c_{\text{Li}} / \text{mol dm}^{-3}$ | $c_{\text{SBP}} / \text{mol dm}^{-3}$ |
|--------------------------------------------------------------|--------------------|-------------------------------------------------|------|----------------|------------------------|-------|--------------------------------------|---------------------------------------|
|                                                              |                    |                                                 |      |                | MD                     | Exp.  |                                      |                                       |
| 1.0 M LiBF <sub>4</sub> /DMC                                 | 200                | –                                               | 2252 | 68.75          | 1.142                  | 1.143 | 1.0                                  | –                                     |
| 2.0 M SBPBF <sub>4</sub> /DMC                                | –                  | 400                                             | 1630 | 69.62          | 1.142                  | 1.143 | –                                    | 2.0                                   |
| *1 M SBPBF <sub>4</sub> /DMC<br>with 0.4 M LiBF <sub>4</sub> | 120                | 300                                             | 1644 | 68.21          | 1.163                  | 1.159 | 0.6                                  | 1.6                                   |
| 1 M SBPBF <sub>4</sub> /DMC<br>with 1 M LiBF <sub>4</sub>    | 190                | 190                                             | 1900 | 68.96          | 1.166                  | 1.155 | 1.0                                  | 1.0                                   |
| neat EMIBF <sub>4</sub>                                      | –                  | 512                                             | –    | 51.80          | 1.218                  | 1.29  | –                                    | –                                     |

\* Bottom phase of 1.0 M SBPBF<sub>4</sub>/DMC with 0.4 M LiBF<sub>4</sub>, corresponding to 1.6 M SBPBF<sub>4</sub>/DMC with 0.6 M LiBF<sub>4</sub>

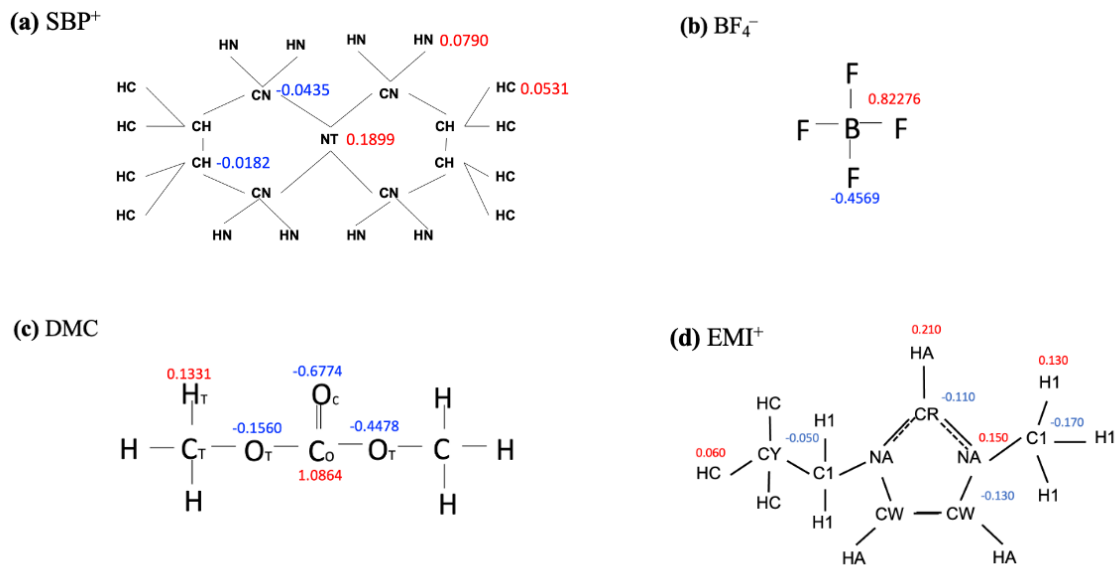

**Figure S1.** Partial charges of (a) SBP<sup>+</sup>, (b) BF<sub>4</sub><sup>-</sup>, (c) DMC, and (d) EMI<sup>+</sup> calculated DFT calculations [ChelpG method: MP2/cc-pVTZ(-f)//HF/6-31G(d)].

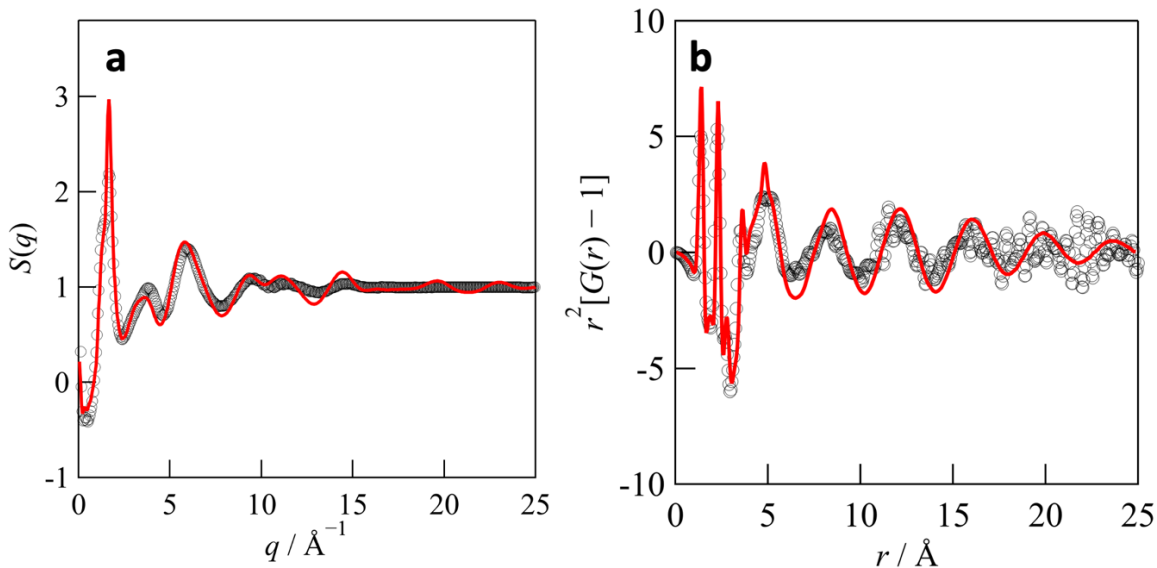

**Figure S2.** (a)  $S(q)$  and (b)  $r^2[G(r) - 1]$  obtained by HEXTS measurements (open black circles) and MD simulations (solid red lines) for 1.0 M LiBF<sub>4</sub>/DMC.

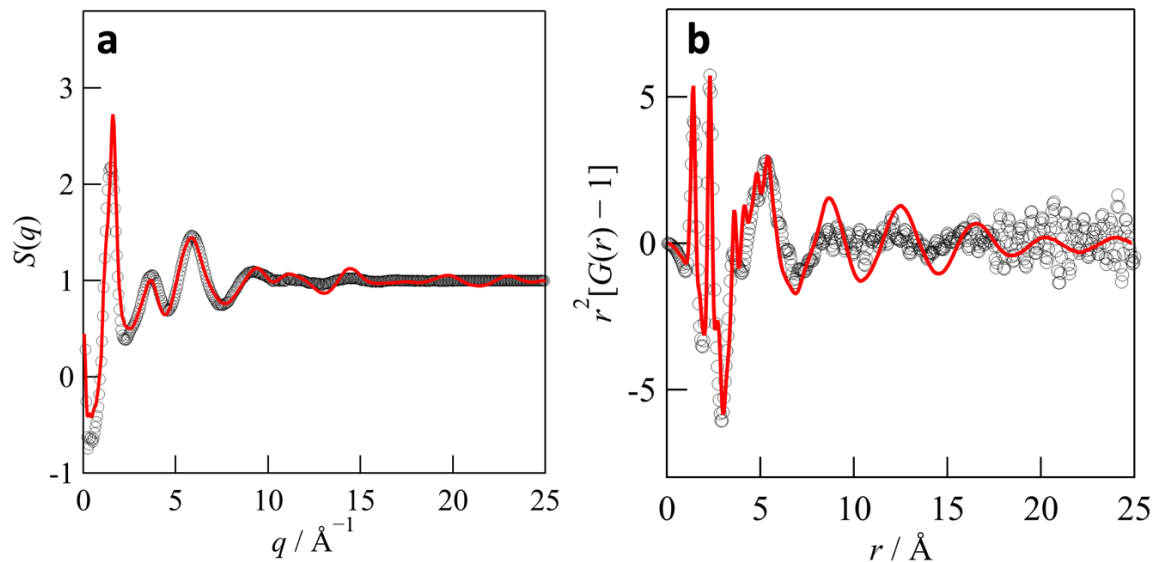

**Figure S3.** (a)  $S(q)$  and (b)  $r^2[G(r) - 1]$  obtained by HEXTS measurements (open black circles) and MD simulations (solid red lines) for 2.0 M SBPBF<sub>4</sub>/DMC.

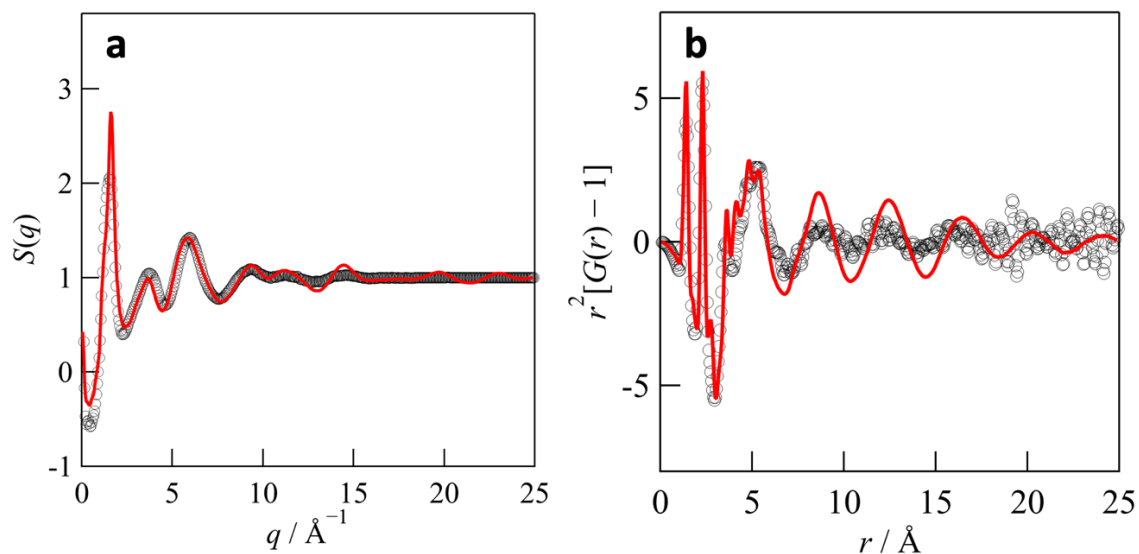

**Figure S4.** (a)  $S(q)$  and (b)  $r^2[G(r) - 1]$  obtained by HEXTS measurements (open black circles) and MD simulations (solid red lines) for 1.6 M SBPBF<sub>4</sub>/DMC with 0.6 M LiBF<sub>4</sub>, corresponding to the bottom phase of 1.0 M SBPBF<sub>4</sub>/DMC solution with 0.4 M LiBF<sub>4</sub>.

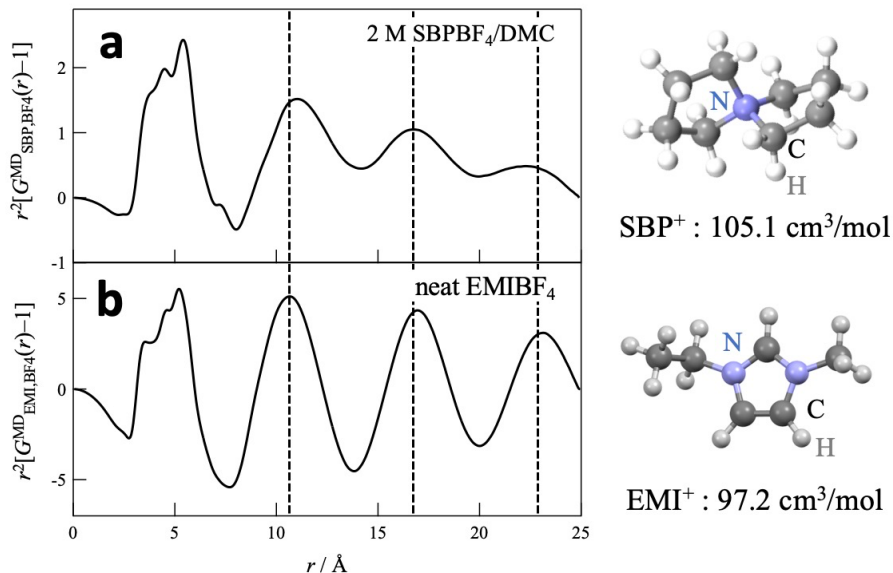

**Figure S5.** The  $r^2[G^{\text{MD}}(r) - 1]$  functions for cation-anion correlations in (a) 2 M SBPBF<sub>4</sub>/DMC (SBP<sup>+</sup>-BF<sub>4</sub><sup>-</sup> correlation) and (b) neat EMIBF<sub>4</sub> (EMI<sup>+</sup>-BF<sub>4</sub><sup>-</sup> correlation). Note that SBP<sup>+</sup> and EMI<sup>+</sup> cations have similar molar volumes, 105.1 cm<sup>3</sup> mol<sup>-1</sup> and 97.2 cm<sup>3</sup> mol<sup>-1</sup>, respectively. It has been established that in popular ionic liquids, cations and anions electrostatically interact with each other to form a highly ionic ordered structure, resulting in clear periodic correlations in  $G(r)$  function,<sup>7,8</sup> as shown in Fig. S5b (EMIBF<sub>4</sub> ionic liquid, in this work). Similar periodic correlations were observed in the 2 M SBPBF<sub>4</sub>/DMC system (Fig. S5a), indicating loosely structured SBP<sup>+</sup>-BF<sub>4</sub><sup>-</sup> aggregates in the DMC solution. We expect that the formation of ionic aggregates is the molecular origin of the specific phase separation in the SBPBF<sub>4</sub>/DMC system.

## References

1. J. C. Soetens, C. Millot and B. Maigret, *Journal of Physical Chemistry A*, 1998, **102**, 1055-1061.
2. W. L. Jorgensen, D. S. Maxwell and J. Tirado-Rives, *Journal of the American Chemical Society*, 1996, **118**, 11225-11236.
3. W. D. Cornell, P. Cieplak, C. I. Bayly, I. R. Gould, K. M. Merz, D. M. Ferguson, D. C. Spellmeyer, T. Fox, J. W. Caldwell and P. A. Kollman, *Journal of the American Chemical Society*, 1995, **117**, 5179-5197.
4. J. N. Canongia Lopes and A. A. Padua, *The Journal of Physical Chemistry B*, 2006, **110**, 19586-19592.
5. J. N. Canongia Lopes, J. Deschamps and A. A. Pádua, *The Journal of Physical Chemistry B*, 2004, **108**, 2038-2047.
6. Z. Liu, S. Huang and W. Wang, *The Journal of Physical Chemistry B*, 2004, **108**, 12978-12989.
7. K. Fujii, R. Kanzaki, T. Takamuku, Y. Kameda, S. Kohara, M. Kanakubo, M. Shibayama, S. Ishiguro and Y. Umebayashi, *Journal of Chemical Physics*, 2011, **135**, 244502.
8. K. Fujii, S. Kohara and Y. Umebayashi, *Physical Chemistry Chemical Physics*, 2015, **17**, 17838-17843.
